# Supplementary material for: Tick-Box for 3′-End Formation of Mitochondrial Transcripts in Ixodida, Basal Chelicerates and Drosophila
Source: PubMed Central journal article supplement (PMC3471875; doi:10.1371/journal.pone.0047538), 2012-10-15
Supplement: pone.0047538.s002.pdf [file pone.0047538.s002.pdf]

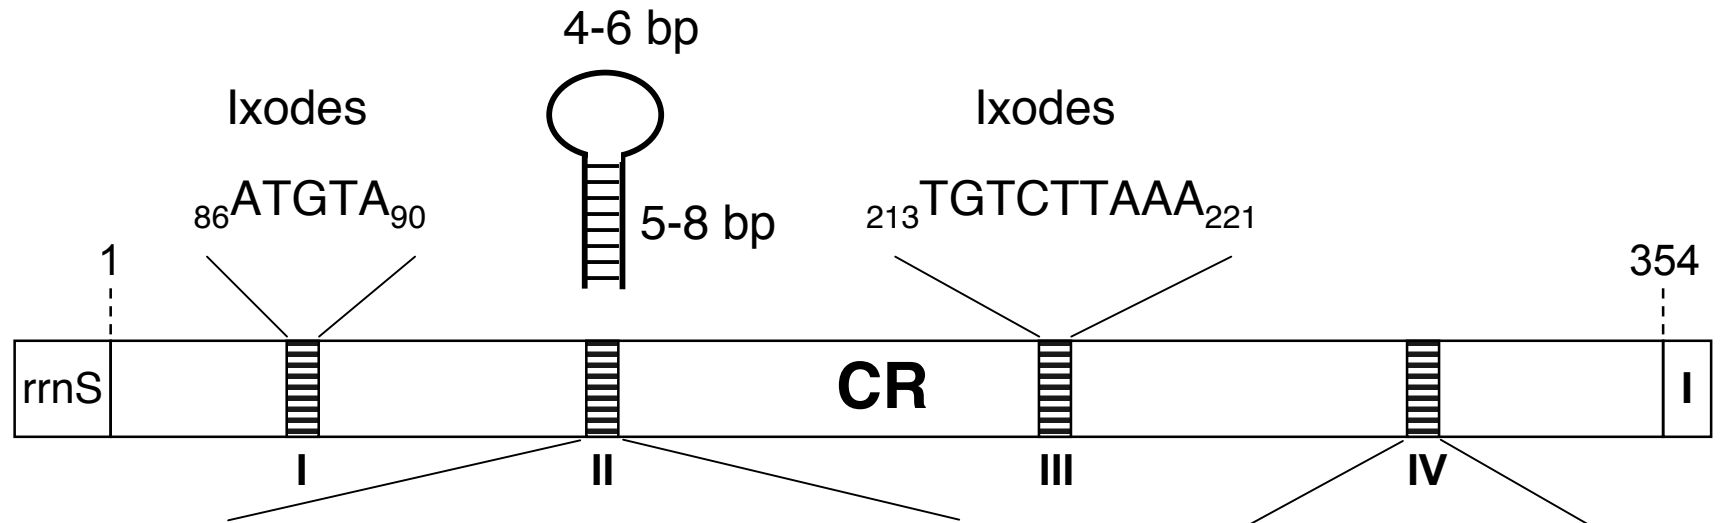

|                          | Secondary structure      | ((((((                   | ))))))                   |     |
|--------------------------|--------------------------|--------------------------|--------------------------|-----|
| Ixodes                   | <i>I. ricinus</i>        | 113                      | --TTCCC- GCTCAA -GGGAA-- | 126 |
|                          | <i>I. persulcatus</i>    |                          | --TTCCC- TCTCAA -GGGAA-- |     |
|                          | <i>I. hexagonus</i>      |                          | --TTCCC- TGATAA -GGGAA-- |     |
|                          | <i>I. cordifer</i>       |                          | ATTTCCCG -CTGG- CGGGAAAT |     |
|                          | <i>I. cordifer_CR2</i>   |                          | ATTTCCCG -CCAG- CGGGAAAT |     |
|                          | <i>I. cornuatus</i>      |                          | ATTTTCCG -CCAG- CGGAAAAT |     |
|                          | <i>I. cornuatus_CR2</i>  |                          | ATTTTCCG -CCAG- CGGAAAAT |     |
|                          | <i>I. hirsti</i>         |                          | ATTTTCCG -CCGG- CGGAAAAT |     |
|                          | <i>I. hirsti_CR2</i>     |                          | ATTTTCCG -CCGG- CGGAAAAT |     |
|                          | <i>I. holocyclus</i>     |                          | ATTTCCCG -AGGA- CGGGAAAT |     |
|                          | <i>I. holocyclus_CR2</i> |                          | ATTTCCCG -AGGA- CGGGAAAT |     |
|                          | <i>I. myrmecobii_b</i>   |                          | ATTTCCCG -CTAG- CGGGAAAT |     |
|                          | <i>I. myrmecobii_a</i>   |                          | ATTTCCCG -CCGG- CGGGAAAT |     |
|                          | <i>I. myrmecobii_CR2</i> |                          | ATTTCCCG -CCGG- CGGGAAAT |     |
|                          | <i>I. trichosuri</i>     |                          | ATTTTCCG -CTGG- CGGAAAAT |     |
| <i>I. trichosuri_CR2</i> |                          | ATTTTCCG -CTGG- CGGAAAAT |                          |     |
| <i>I. uriae</i>          |                          | ATTTTCC- GTAGAA -GGAAAAT |                          |     |
| <i>I. uriae_CR2</i>      |                          | ATTTTCC- GTAGAA -GGAAAAT |                          |     |
| Argasidae                | <i>O. moubata</i>        |                          | ATGCTTAC -ACAG- GTAAGCAT |     |
|                          | <i>O. porcinus</i>       |                          | ATGCTTAC -ACAG- GTAAGCAT |     |
|                          | <i>O. carios</i>         |                          | -GGTTTAC -GGCA- GTAAACC- |     |

271 GCYCCTTAY<sub>279</sub> Ixodidae  
 271 GCTMCCAAT<sub>279</sub> Argasidae
